# Supplementary material for: Non-Redundant tRNA Reference Sequences for Deep Sequencing Analysis of tRNA Abundance and Epitranscriptomic RNA Modifications
Source: PubMed Central journal article supplement (PMC7827920; doi:10.3390/genes12010081), 2021-01-10
Supplement: genes-12-00081-s001.pdf [file genes-12-00081-s001.pdf]

# Supplement

## Non-redundant tRNA reference sequences for deep sequencing analysis of tRNA abundance and epitranscriptomics modifications

Florian PICHOT<sup>1,2</sup>, Virginie MARCHAND<sup>2</sup>, Mark HELM<sup>1</sup>, Yuri MOTORIN<sup>2,3\*</sup>

Figure S1 Number of genomic tRNA genes detected by tRNAScanSE (source gtRNAdb). Genomes (~250 in total) were randomly chosen to provide representative selection for Archaea (35 genomes), Bacteria (150 genomes) and Eukaryota (65 genomes). Only tRNA genes corresponding to 20 standard amino acids were considered. Panel A represents global distribution (number of tRNA genes in log10 scale), panel B – same data sorted by Kingdom. Panel C shows the number of tRNA genes in non-redundant (blue) and in optimized (Step2) references (red), in function of the total number of tRNA genes in genomic reference. Panel D, E and F show distribution by Kingdom and phyla/groups.

Figure S2: Alignment results for NonDuplicated (non-redundant) tRNA reference (Step1) and optimized tRNA set (Step2) for *D. melanogaster* and *H. sapiens* references, maximal distance used is 8 substitutions

Figure S3: Sequences of tRNA species showing excessive ambiguous mapping for *D. melanogaster* and *H. sapiens* references

Figure S4: Barplots representing unique and multiple mapping by tRNA species for final manually curated tRNA references (Step3).

Table S1: Characteristics of deep sequencing datasets used for analysis.

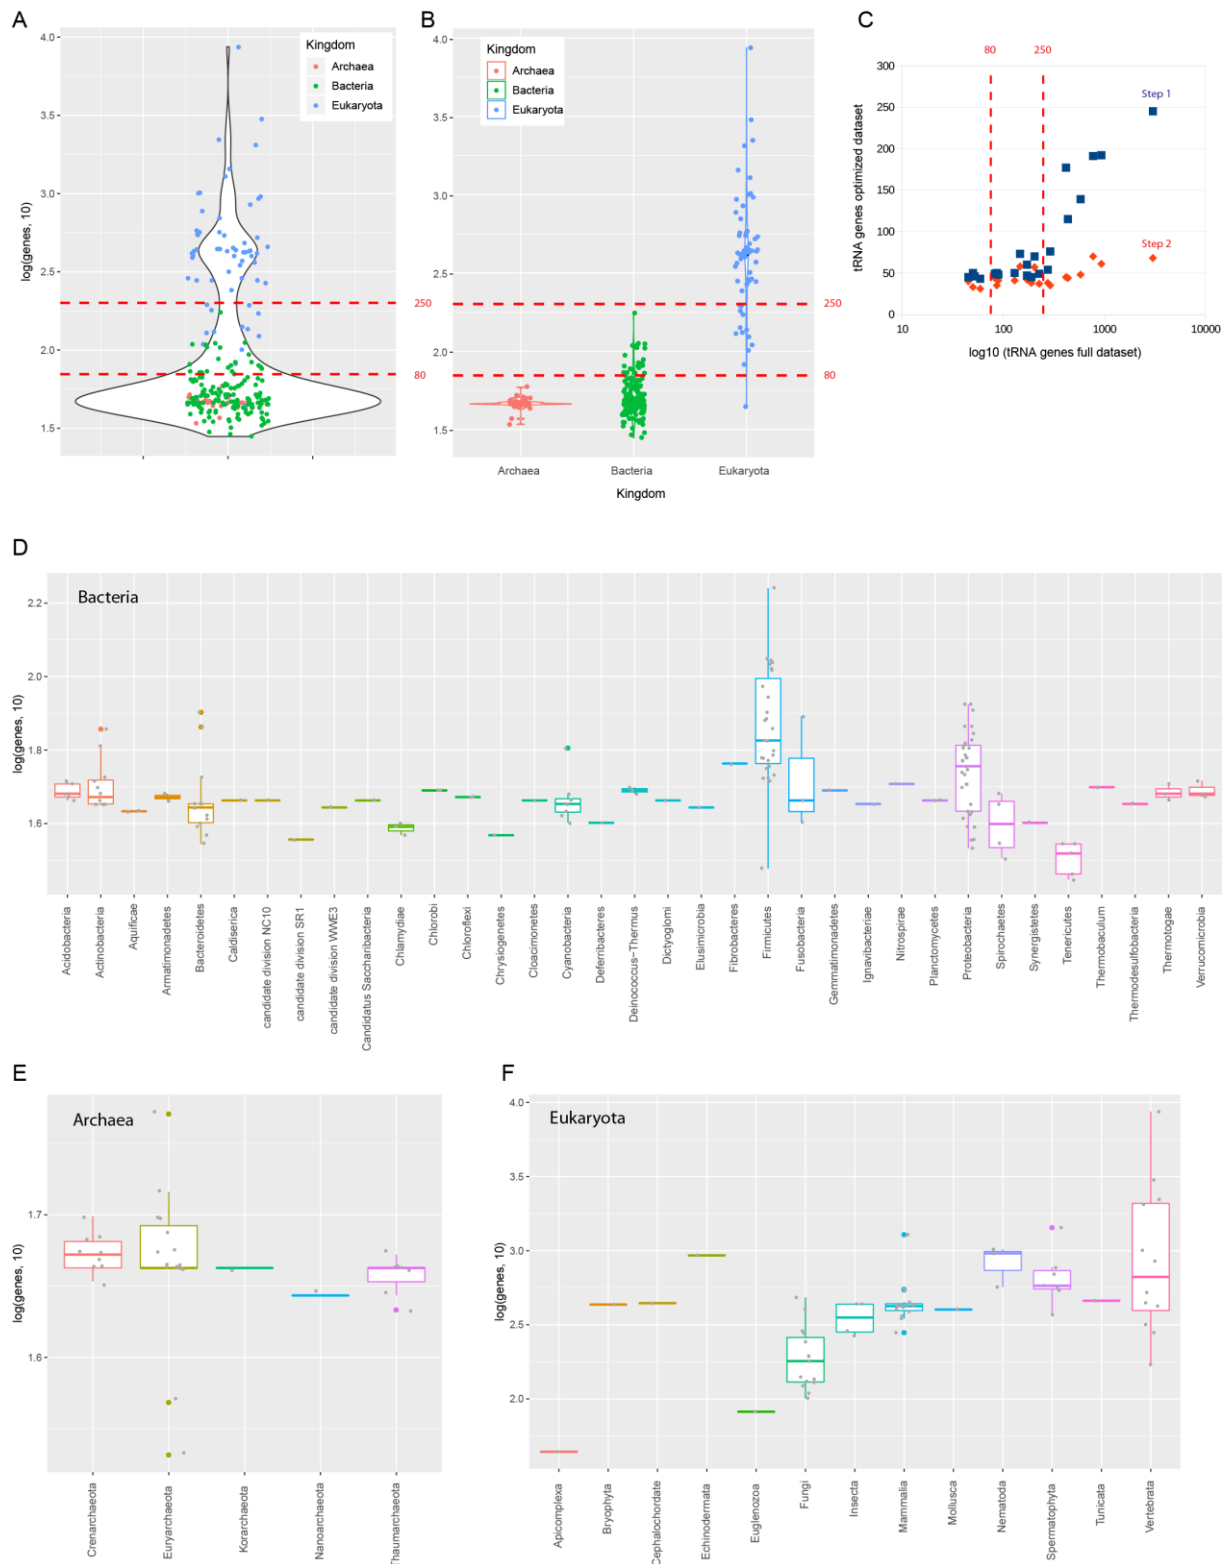

**Figure S1** Number of genomic tRNA genes detected by tRNAScanSE (source gtRNAdb). Genomes (~250 in total) were randomly chosen to provide representative selection for Archaea (35 genomes), Bacteria (150 genomes) and Eukaryota (65 genomes). Only tRNA genes corresponding to 20 standard amino acids were considered. Panel A represents global distribution (number of tRNA genes in log<sub>10</sub> scale), panel B – same data sorted by Kingdom. Panel C shows the number of tRNA genes in non-redundant (blue) and in optimized (Step2) references (red), in function of the total number of tRNA genes in genomic reference. Panel D, E and F show distribution by Kingdom and phyla/groups.

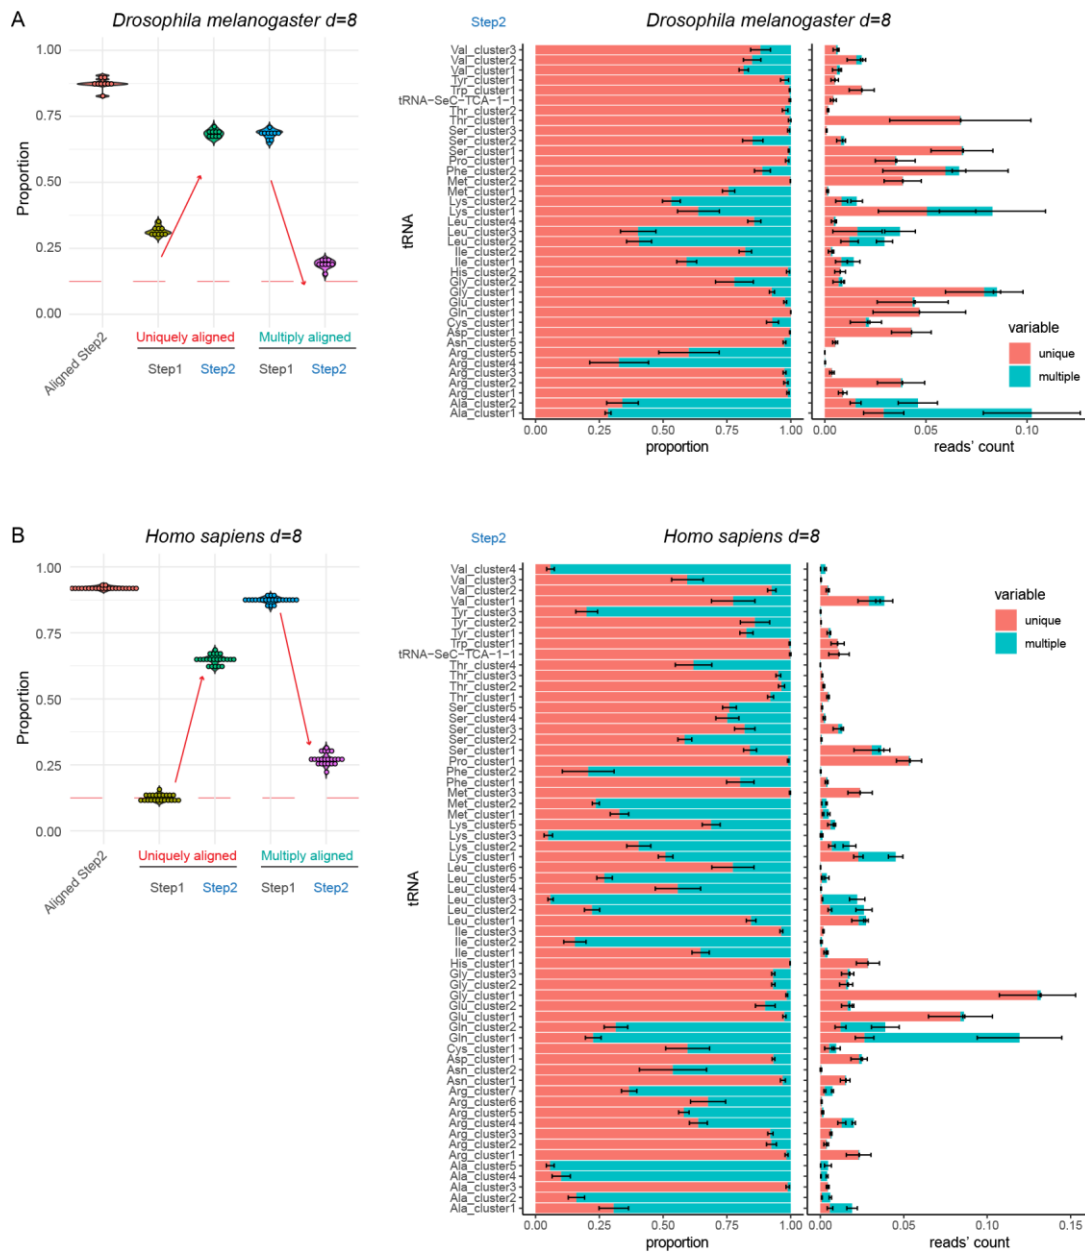

**Figure S2** Alignment results for Non Duplicated (non redundant) tRNA reference (Step1) and optimized tRNA set (Step2) for *D. melanogaster* and *H. sapiens* references, maximal distance used is 8 substitutions. Boxplot on the left shows the proportion of tRNA sequencing reads aligned to Step2 reference ('Aligned Step2') and proportions of uniquely and multiply mapped reads at both steps. Red dashed line indicate 12.5% level. Increase of unique mapping and decrease of multiple mapping is shown by arrows. Barplots at the right represent unique and multiple mapping by tRNA species at Step2, in proportion to total and in absolute number of sequencing reads obtained by tRNA, expressed as proportion to total number of mapped reads. tRNAs showing excessive proportion of ambiguous mapping are shown in red.

D.melanogaster tRNA<sup>Leu2</sup> and tRNA<sup>Leu3</sup>  
 Leu3 1>GTCAGGATGGCCGAG**TGGTCT**NAAGGCGC**TGCGTT**CAGGT**CGCAGTCTACTCTGTAGGCGTGGGTTCGAATCCCAC**TTCTGACA>83  
 Leu2 1>GTCAGGATGGCCGAG**CGGTCT**NAAGGCGC**CAGACT**CAGTT**CTGGTCTCTCTGAGGCGTGGGTTCGAATCCCAC**TTCTGACA>83

H.sapiens tRNA<sup>Leu2</sup> and tRNA<sup>Leu3</sup>  
 Leu3 1>GTCAGGATGGCCGAG**CNGTCT**NAAGGCGC**TGCGTT**CANNT**CGCANNCTCC**-N**CTGGAGGCGTGGGTTCGAATCCCAC**T**NNT**GACA>84  
 Leu2 1>GTCAGGATGGCCGAG**TGGTCT**-AAGGCGC**CAGACT**CAGTT**CTGGTCTCCNNA**TGGAGGCGTGGGTTCGAATCCCAC**TTCT**GACA>84

H.sapiens tRNA<sup>Tyr1</sup>, Tyr2 and Tyr3  
 Tyr2 1>**CCTTCAATAGT**TCAGCTGGTAGAGC**AGAGGACT**ATAGGGT**CTTAGGTT**-GCTGGTT**CGATTCCAGCTTGAAGGA**>73  
 Tyr3 1>**TCTTCAATAGC**TCAGCTGGTAGAGC**GGAGGACT**GTAGATT**CTTAGG**-T-GCTGGTT**TGATTCCGACTTGGAGAG**>72 minor

Tyr3 1>**TCTTCA**AATAGCTCAG**CTGGTAGAGCGGAGGACT**GTAGATT**CTTAGG**-T-GCTGGTT**TGATTCCGACTTGGAGAG**>72 minor  
 Tyr1 1>**CCTTCG**ATAGCTCAG**NTGGTAGAGCGGAGGACT**GTAGAT**CTTAGG**-TCGCTGGTT**CGANTCCGGCTCGAAGGA**>73

H.sapiens tRNA<sup>Ala1</sup> and tRNA<sup>Val3</sup>  
 Val3 1>GGGGGTGTAGCTCAGTGGTAGAGCG**TAT**GGCTT**AAC**AT**TCAT**GAGGCT**CTGGG**TCGATCCCC**AGC**ACT**TTCCA**>72  
 Ala1 1>GGGGGTGTAGCTCAGTGGTAGAGCG**CNT**GGCTT**NGC**AT**GTAT**GAGGCC**CCGGG**TCGATCCCC**GGC**ACT**TTCCA**>72

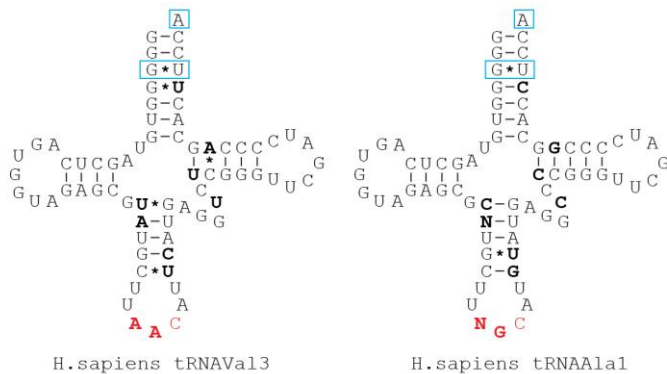

**Figure S3** Sequences of tRNA species showing excessive ambiguous mapping for *D. melanogaster* and *H. sapiens* references. Non-identical nucleotides are in bold case, anticodon is in red and underlined.

Bottom – cloverleaf structures of *H. sapiens* tRNA<sup>Val3</sup>(AAC) and tRNA<sup>Ala1</sup>(NGC). Substitutions are in bold case. Anticodon is in red. Excessive number of mismatched nucleotides in tRNA<sup>Val3</sup>(AAC) stems may drive its instability (degradation) in vivo. Conserved identity elements for AlaRS aminoacylation (A73 and G3\*U70) are boxed in blue. 3'-CCA sequence not shown.

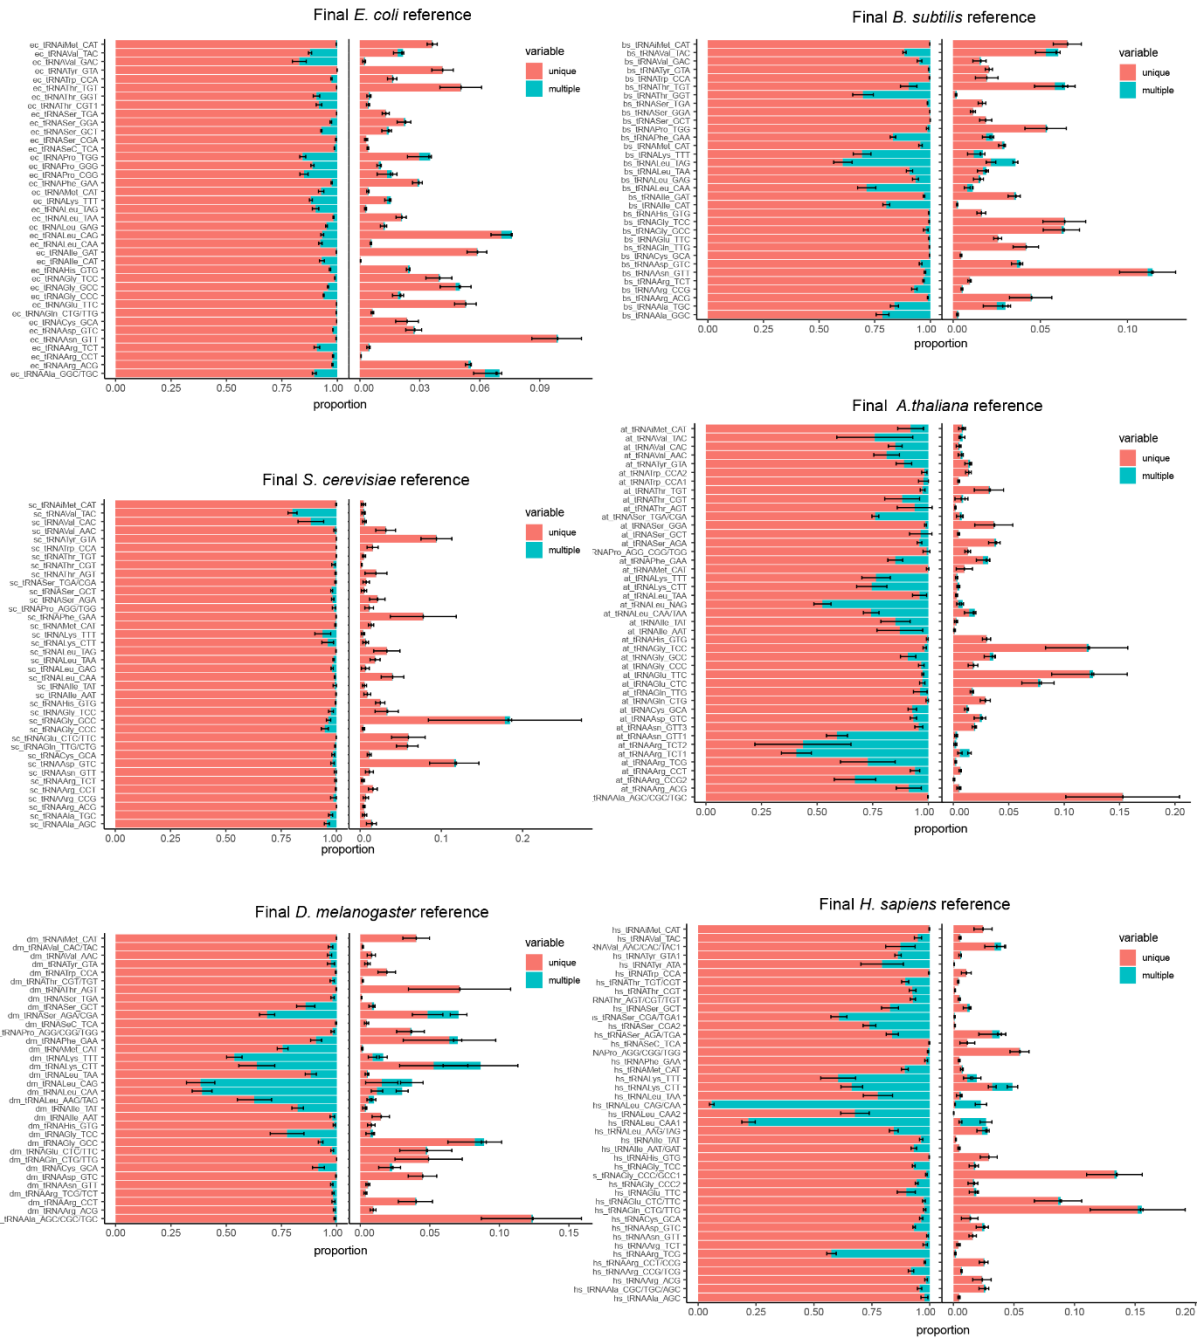

**Figure S4** Barplots representing unique and multiple mapping by tRNA species for final manually curated tRNA references (Step 3), in proportion to total and in absolute number of sequencing reads obtained by tRNA, expressed as proportion to total number of mapped reads.

Table S1 Characteristics of datasets used in this study

|                                                    | Rerence    |               |                                |            |                 |
|----------------------------------------------------|------------|---------------|--------------------------------|------------|-----------------|
| Number of raw reads for eache experimental dataset | tRNA_Step1 | total_reads   |                                |            |                 |
| Full collection of RNA-aligned reads               | tRNA_Step2 | total_reads   | aligned 1 time+aligned >1 time |            |                 |
|                                                    |            |               |                                |            |                 |
|                                                    |            |               | Total raw teads                | tRNA reads | % of tRNA reads |
| E.coli                                             | Sample1    | tRNA fraction | 6263160                        | 2740932    | 43,76%          |
|                                                    | Sample2    | tRNA fraction | 7055237                        | 3146981    | 44,60%          |
|                                                    | Sample3    | tRNA fraction | 6761865                        | 3090704    | 45,71%          |
|                                                    | Sample4    | tRNA fraction | 6734371                        | 2734340    | 40,60%          |
|                                                    | Sample5    | tRNA fraction | 7069232                        | 2859861    | 40,46%          |
|                                                    | Sample6    | tRNA fraction | 6384822                        | 2541778    | 39,81%          |
|                                                    | Sample7    | tRNA fraction | 6913919                        | 2717982    | 39,31%          |
|                                                    | Sample8    | tRNA fraction | 7100802                        | 2966758    | 41,78%          |
|                                                    | Sample9    | tRNA fraction | 5942508                        | 2464554    | 41,47%          |
|                                                    |            |               |                                |            |                 |
| B.subtilis                                         | Sample1    | total RNA     | 11850717                       | 1082144    | 9,13%           |
|                                                    | Sample2    | total RNA     | 9905607                        | 907391     | 9,16%           |
|                                                    | Sample3    | total RNA     | 8083896                        | 344249     | 4,26%           |
|                                                    | Sample4    | total RNA     | 10314385                       | 515336     | 5,00%           |
|                                                    | Sample5    | total RNA     | 10728232                       | 618823     | 5,77%           |
|                                                    | Sample6    | total RNA     | 8411810                        | 563490     | 6,70%           |
|                                                    |            |               |                                |            |                 |
| S.cerevisiae                                       | Sample1    | tRNA fraction | 6122762                        | 2493122    | 40,72%          |
|                                                    | Sample2    | tRNA fraction | 3689248                        | 1762221    | 47,77%          |
|                                                    | Sample3    | total RNA     | 7370764                        | 342154     | 4,64%           |
|                                                    | Sample4    | tRNA fraction | 5825861                        | 1544905    | 26,52%          |
|                                                    | Sample5    | tRNA fraction | 8271492                        | 1418863    | 17,15%          |
|                                                    | Sample6    | total RNA     | 2185479                        | 103817     | 4,75%           |
|                                                    | Sample7    | total RNA     | 2509444                        | 140624     | 5,60%           |
|                                                    | Sample8    | total RNA     | 3721514                        | 114760     | 3,08%           |
|                                                    | Sample9    | total RNA     | 4708804                        | 314691     | 6,68%           |
|                                                    |            |               |                                |            |                 |
| A.thaliana                                         | Sample1    | total RNA     | 987701                         | 41512      | 4,20%           |
|                                                    | Sample2    | total RNA     | 1253825                        | 4088       | 0,33%           |
|                                                    | Sample3    | total RNA     | 1372257                        | 4643       | 0,34%           |
|                                                    | Sample4    | total RNA     | 1167114                        | 12066      | 1,03%           |
|                                                    | Sample5    | total RNA     | 1020172                        | 50178      | 4,92%           |
|                                                    | Sample6    | total RNA     | 750254                         | 50086      | 6,68%           |
|                                                    | Sample7    | total RNA     | 783698                         | 2820       | 0,36%           |
|                                                    | Sample8    | total RNA     | 959869                         | 32194      | 3,35%           |
|                                                    | Sample9    | total RNA     | 996683                         | 3909       | 0,39%           |
|                                                    |            |               |                                |            |                 |
| D.melanogaster                                     | Sample1    | total RNA     | 8251871                        | 132553     | 1,61%           |
|                                                    | Sample2    | total RNA     | 6870549                        | 169509     | 2,47%           |

|           |          |           |          |         |        |
|-----------|----------|-----------|----------|---------|--------|
|           | Sample3  | total RNA | 8074747  | 182283  | 2,26%  |
|           | Sample4  | total RNA | 7095027  | 175671  | 2,48%  |
|           | Sample5  | total RNA | 7708891  | 91181   | 1,18%  |
|           | Sample6  | total RNA | 3773733  | 147751  | 3,92%  |
|           | Sample7  | total RNA | 5028137  | 133589  | 2,66%  |
|           | Sample8  | total RNA | 3868242  | 380404  | 9,83%  |
|           | Sample9  | total RNA | 4125326  | 108959  | 2,64%  |
|           |          |           |          |         |        |
| H.sapiens | Sample1  | total RNA | 5709307  | 484384  | 8,48%  |
|           | Sample2  | total RNA | 7054479  | 1272210 | 18,03% |
|           | Sample3  | total RNA | 6045177  | 1411462 | 23,35% |
|           | Sample4  | total RNA | 7712830  | 983453  | 12,75% |
|           | Sample5  | total RNA | 8075164  | 853727  | 10,57% |
|           | Sample6  | total RNA | 5616878  | 1521167 | 27,08% |
|           | Sample7  | total RNA | 7372670  | 819355  | 11,11% |
|           | Sample8  | total RNA | 7736096  | 578414  | 7,48%  |
|           | Sample9  | total RNA | 4610880  | 503939  | 10,93% |
|           | Sample10 | total RNA | 21143768 | 2102833 | 9,95%  |
|           | Sample11 | total RNA | 25065494 | 2563001 | 10,23% |
|           | Sample12 | total RNA | 20896274 | 2321345 | 11,11% |
|           | Sample13 | total RNA | 23307498 | 2936908 | 12,60% |
|           | Sample14 | total RNA | 21629529 | 2435938 | 11,26% |
|           | Sample15 | total RNA | 20399296 | 2024903 | 9,93%  |
|           | Sample16 | total RNA | 20384433 | 2390957 | 11,73% |
|           | Sample17 | total RNA | 10588468 | 1058261 | 9,99%  |
|           | Sample18 | total RNA | 7750967  | 776801  | 10,02% |
|           | Sample19 | total RNA | 8255650  | 630847  | 7,64%  |
|           | Sample20 | total RNA | 10175967 | 572478  | 5,63%  |
|           | Sample21 | total RNA | 9393861  | 600585  | 6,39%  |
|           | Sample22 | total RNA | 10174935 | 848865  | 8,34%  |

## Detailed description of modifications in final tRNA references

Problematic cases

### *Escherichia coli*

```
>Thr_cluster1 consensus sequence tRNA-Thr-CGT-1-1
GCCGATATAGCTCAGTTGGTAGAGCAGCGCATTCGTAATGCGAAGGTCGTAGGTTTCGACTCCTATTATCGGCACCA
>Thr_cluster2 consensus sequence tRNA-Thr-CGT-2-1
GTAGTTAAAAATGCATTAACATCGCATTTCGTAATGCGAAGGTCGTAGGTTTCGACTCCTATTATCGGCACCA
>Thr_cluster3 consensus sequence tRNA-Thr-GGT-1-1|tRNA-Thr-GGT-2-1
GCTGATATNGCTCAGTTGGTAGAGCGCACCCCTGGTAAGGGTGAGGTCNNCAGTTCGANCTGNNATATCAGCACCA
>Thr_cluster4 consensus sequence tRNA-Thr-TGT-1-1
GCCGACTTAGCTCAGTAGTAGAGCAACTGACTTGTAAATCAGTAGGTCACCGATTTCGGTAGTTCGGCACCA
```

```
Thr_cluster1 -- Matches:76; Mismatches:0; Gaps:0; Unattempted:0
Thr_cluster2 -- Matches:60; Mismatches:11; Gaps:5; Unattempted:0
Thr_cluster3 -- Matches:54; Mismatches:22; Gaps:0; Unattempted:0
Thr_cluster4 -- Matches:56; Mismatches:20; Gaps:0; Unattempted:0
```

\* \* \* \* \*

```
Thr_cluster1 1>GCCGATATAGCTCAGTTGGTAGAGCAGCGCATTCGTAATGCGAAGGTCGTAGGTTTCGACTCCTATTATCGGCACCA>76
Thr_cluster2 1>GTAGTTAAAAATGCATT-----AACATCGCATTTCGTAATGCGAAGGTCGTAGGTTTCGACTCCTATTATCGGCACCA>71
Thr_cluster3 1>GCTGATATNGCTCAGTTGGTAGAGCGCACCCCTGGTAAGGGTGAGGTCNNCAGTTCGANCTGNNATATCAGCACCA>76
Thr_cluster4 1>GCCGACTTAGCTCAGTAGTAGAGCAACTGACTTGTAAATCAGTAGGTCACCGATTTCGGTAGTTCGGCACCA>76
```

**Conclusion:** Thr\_cluster2 CGT=ec\_tRNAThr\_CGT2 is probable pseudogene, no U8, no G18/G19 in the D-loop (removed from the reference)

```
>Arg_cluster1 consensus sequence tRNA-Arg-ACG-1-1=tRNA-Arg-ACG-1-2=tRNA-Arg-ACG-1-3=tRNA-Arg-ACG-1-4
GCATCCGTAGCTCAGCTGATAGAGTACTCGGCTACGAACCGAGCGGTTCGAGGTTTCGAATCCTCCCGGATGCACCA
>Arg_cluster2 consensus sequence tRNA-Arg-CCG-1-1
GCGCCCGTAGCTCAGCTGGATAGAGCGCTGCCCTCCGGAGGAGAGGTTTCAGGTTTCGAATCCTTCGGGCGCGCCA
>Arg_cluster3 consensus sequence tRNA-Arg-CCT-1-1
GTCCCTTAGTTAAATGGATATAACGAGCCCCCTTAAGGGCTAATGCAGGTTTCGATTCCTGCAGGGGACACCA
>Arg_cluster4 consensus sequence tRNA-Arg-TCT-1-1
GCGCCCTAGCTCAGTTGGATAGAGCAACGACCTTCTAAGTCGTGGGCGCAGGTTTCGAATCCTGCAGGGCGCGCCA
```

```
Arg_cluster1 -- Matches:77; Mismatches:0; Gaps:0; Unattempted:0
Arg_cluster2 -- Matches:57; Mismatches:20; Gaps:0; Unattempted:0
Arg_cluster3 -- Matches:45; Mismatches:29; Gaps:4; Unattempted:0
Arg_cluster4 -- Matches:55; Mismatches:21; Gaps:2; Unattempted:0
```

\* \* \* \* \*

```
>Arg_cluster1 1>GCATCCGTAGCTCAGCTGGATAGAGTACTCGGCTACGAA-CCGAGC-GGTCGGAGGTTTCGAATCCTCCCGGATGCACCA>77
>Arg_cluster2 1>GCGCCCGTAGCTCAGCTGGATAGAGCGCTGCCCTCCGGA-GGCAGA-GGTCTCAGGTTTCGAATCCTTCGGGCGCGCCA>77
>Arg_cluster3 1>GTCCCTTAGT-TTAAATGGATATAACGAGCCCCCTCCTAA---GGGCTAATGCAGGTTTCGATTCCTGCAGGGGACACCA>75
>Arg_cluster4 1>GCGCCCTTAGCTCAGTTGGATAGAGCAACGACCTTCTAAGTCGTG-GGCCGAGGTTTCGAATCCTGCAGGGCGCGCCA>77
```

**Conclusion:** Low-expressed Arg\_cluster2=ec\_tRNAArg\_CCG shows identical regions with highly expressed Arg\_cluster1 (thus Arg\_cluster2 is removed from the reference)

Inosine-34 is known to be present in:

```
>ec_tRNAArg_ACG gcacccgtagctcagctggatagagtactcggctcgaaccgagcggtcggaggttcgaatcctcccgatgcacca
```

Final E.coli reference 39 sequences : Final\_Step3\_Escherichia\_coli\_str\_K-12\_substr\_MG1655\_\_39seq\_2020-11-27

### *Bacillus subtilis*

```
>Arg_cluster1 consensus sequence tRNA-Arg-ACG-1-1=tRNA-Arg-ACG-1-2=tRNA-Arg-ACG-1-3=tRNA-Arg-ACG-1-4
GCGCCCGTAGCTCAATTGGATAGAGCGTTTACTACGGATCAAAGGTTAGGGGTTTCGACTCCTCTCGGGCGCGCCA
>Arg_cluster2 consensus sequence tRNA-Arg-CCG-1-1
GCGCTCGTAGCTCAGTTGGATAGAGCGGTGGTTTCCGGTACCACGTTCTGCGGGGTTTCGAATCCTCCGAGCGCG
>Arg_cluster3 consensus sequence tRNA-Arg-CCT-1-1
GCTCTAGTAGCACAGCGGATAGTGCAGGTTTCTAACTGCAGGTCGGGAGTTCGAATCCTCTCTAGAGCG
>Arg_cluster4 consensus sequence tRNA-Arg-TCT-1-1
GTCCAGTAGCTCAGCTGGATAGAGCAACGGCCTTCTAAGCCGTCGGTTCGGGAGTTCGAATCCTCTCTGGGAGC
```

```
>Arg_cluster1 -- Matches:77; Mismatches:0; Gaps:0; Unattempted:0
>Arg_cluster2 -- Matches:55; Mismatches:19; Gaps:5; Unattempted:0
>Arg_cluster3 -- Matches:45; Mismatches:27; Gaps:6; Unattempted:0
>Arg_cluster4 -- Matches:47; Mismatches:27; Gaps:3; Unattempted:0
```

\* \* \* \* \*

```
>Arg_cluster1 1>GCGCCCGTAGCTCAATTGGATAGAGCGTTTACTACGG-ATCA-AAAGGTTAGGGGTTTCGACTCCTCT-CGGGCGCGCCA>77
>Arg_cluster2 1>GCGCTCGTAGCTCAGTTGGATAGAGCGGTGGTTTCCGGTACCACGTTCTGCGGGGTTTCGAATCCTCT-CGAGCGCG~~~>76
>Arg_cluster3 1>GCTCTAGTAGCAC-AGCGGATAGTGCAGGTTTCTTA-AACT-GCAAGTTCGGGAGTTCGAAT-CTCTCTTAGAGCG~~~>73
>Arg_cluster4 1>GTCCAGTAGCTCAGTTGGATAGAGCAACGGCCTTCTA-AGCC-GTCCGGTTCGGGAGTTCGAAT-CTCTCTGGGAGC>74
```

**Conclusion:** Low-expressed Arg\_cluster3=bs\_tRNAArg\_CCT shows identical regions with highly expressed Arg\_cluster4 (thus Arg\_cluster3 is removed from the reference)

```
>Leu_cluster3 consensus sequence tRNA-Leu-CAG-1-1
GCGGATGTGGCGGAATTGGCAGACGCGCTAGAAATCAGGCTCTAGTGTCTTTACAGACGTTGGGGTTCAAGTCCCTTCATCCGCACCA
>Leu_cluster5 consensus sequence tRNA-Leu-TAG-1-1|tRNA-Leu-TAG-2-1
GCGGGTGTGGCGGAATTGGCAGACGCGCTAGACTTAGGATCTAGTGTCTTNANGACGTTGGGGTTTCNAGTCCCTTCACCCGCA
```



>Leu\_cluster3 -- Matches:75; Mismatches:8; Gaps:4; Unattempted:0  
>Leu\_cluster5 -- Matches:83; Mismatches:0; Gaps:0; Unattempted:0

\* \* \* \* \*

>Leu\_cluster3 1>GCGGATGTGGCGGAATTGGCAGACGCGCTAGAAATCAGGCCTCTAGTGTCTTTACAGACGTGGGGGTTCAAGTCCCTTCATCCGCACCA  
>Leu\_cluster5 1>GCGGGTGTGGCGGAATTGGCAGACGCGCTAGACTTAGGACTCTAGTGTCTTNA-NGACGTGGGGGTTCCAGTCCCTTCACCCGC

**Conclusion:** Very high level of identity between two tRNAs Leu\_cluster3=bs\_tRNA<sub>Leu\_CAG</sub> is removed from the reference

Inosine-34 is known to be present in:

>bs\_tRNA<sub>Arg\_ACG</sub> ggcgccgtagctcaattggatagagcgtttgactccggatcaaaaggttaggggttcgactcctctcgggagcgcca

**Saccharomyces cerevisiae**

No manual adaptations required

Inosine-34 is known to be present in:

>sc\_tRNA<sub>Ala\_AGC</sub> gggcgtgtggcgtagtcggtagcgcgctcccttggcatgggagaggttccggttcgattccggactcgtccacca  
>sc\_tRNA<sub>Arg\_ACG</sub> ttctcgtggcccaatgggtcacggcgtctggctccgaaccagnagattccaggttcnagtcctggcggggaagcca  
>sc\_tRNA<sub>Ile\_AAT</sub> ggtctcttggcccagttggttaaggcaccgctgctcacaacgcgggatcagcgggttcgatcccgctagagaccacca  
>sc\_tRNA<sub>Ser\_AGA</sub> gccaacttggccgagtggttaaggcgaagattcgaatctttgggcttgncccgcgagttcgagtcctgctgttcgcca  
>sc\_tRNA<sub>Thr\_AGT</sub> gcttctatggccaagttggttaaggccacactggtaatgtggagatcatcgggtcacaatccgattggaagcca  
>sc\_tRNA<sub>Val\_AAC</sub> ggtttcgtggtctagtcggttatggcatctgcttccacgcgagaacgtccccagttcgatcctggcgaaatcncca

**Arabidopsis thaliana**

>Arg\_cluster1 consensus sequence tRNA-Arg-ACG-1-1=tRNA-Arg-ACG-5-1=tRNA-Arg-ACG-5-2|tRNA-Arg-ACG-2-1=tRNA-Arg-ACG-3-1=tRNA-Arg-ACG-3-2|tRNA-Arg-ACG-6-1=tRNA-Arg-ACG-6-2|tRNA-Arg-ACG-4-1  
GACTCCATGGCCCAATGGATAAGGCGCTGGTCTACGAAACCAGAGATTCTGGGTTCCGATCCCCAGTGGAGTCG  
>Arg\_cluster2 consensus sequence tRNA-Arg-TCG-1-1=tRNA-Arg-TCG-1-2=tRNA-Arg-TCG-1-3|tRNA-Arg-TCG-2-1=tRNA-Arg-TCG-2-2=tRNA-Arg-TCG-2-3  
GACCGCATAGCGCAGTGGATTAGCGCGTNTGACTTCGGATCANAAGGTCGTTGGGTTTCGACTCCCAGTGGTTCG  
>Arg\_cluster3 consensus sequence tRNA-Arg-TCT-1-1=tRNA-Arg-TCT-5-1=tRNA-Arg-TCT-5-2|tRNA-Arg-TCT-2-1=tRNA-Arg-TCT-7-1=tRNA-Arg-TCT-8-1|tRNA-Arg-TCT-3-1=tRNA-Arg-TCT-4-1  
GCACCCGTGGCCTAATGGATAAGGCGTTTGCATCTAATCAAACGATTGTGGGTTTCGAGTCCCACCGGGTGTG  
>Arg\_cluster4 consensus sequence tRNA-Arg-CCG-3-1=tRNA-Arg-CCG-3-2|tRNA-Arg-CCG-2-1  
GNNNGCGTGGCCTAATGGATAAGGCGCTCGCCTCCNAGCGGGAGATTGTGGGTTTCGANTCCANCNGNNG  
>Arg\_cluster5 consensus sequence tRNA-Arg-CCT-1-1=tRNA-Arg-CCT-1-2=tRNA-Arg-CCT-1-3=tRNA-Arg-CCT-1-4=tRNA-Arg-CCT-1-5=tRNA-Arg-CCT-2-1|tRNA-Arg-CCT-3-1  
GCGCCTGTAGCTCAGTGGATAGAGCGTCTGTTTCCTAAGCAGAANGTCGNAGGTTTCGACCCCTNCCCTGGCGCG  
>Arg\_cluster6 consensus sequence tRNA-Arg-TCT-6-1  
GCGCTCGTGGCCCAATGGATAAGGCGTCTGACTTCTAATCAGACGATTGTGGGTTTCGATCCCCACCGAGCGTG  
>Arg\_cluster7 consensus sequence tRNA-Arg-CCG-1-1  
GATCCCATAGCGGAGTGGATATCGCGTTAGACTCCGAATCTAAAGTTCGTTGGGTTTCGATCCCAGTGGATCA  
  
>Arg\_cluster1 1>GACTCCATGGCCCAATGGATAAG-GCGCTGGTCTACGAAACCAGAGATTCTGGGTTTCGATCCC-CAGTG-GAGTCG>73  
>Arg\_cluster2 1>GACCGCATAGCGCAGTGGATTAGCGCGTNTGACTTCGGATCANAAGGTCGTTGGGTTTCGACTCC-CACTG-TGGTCG>74  
>Arg\_cluster3 1>GCACCCGTGGCCTAATGGATAAG-GCGTTTGCATCTAATCAAACGATTGTGGGTTTCGAGTCC-CACCG-GGTGTG>73  
>Arg\_cluster4 1>GNNNGCGTGGCCTAATGGATAAG-GCGCTCGCCTCCNAGCGGGAGATTGTGGGTTTCGANTCC-CANCG-NGNNCG>73  
>Arg\_cluster5 1>GCGCCTGTAGCTCAGTGGATAGA-GCGTCTGTTTCCTAAGCAGAANGTCGNAGGTTTCGACCCCTNCCCTG-CG>73  
>Arg\_cluster6 1>GCGCTCGTGGCCCAATGGATAAG-GCGTCTGACTTCTAATCAGACGATTGTGGGTTTCGATCCC-CACCGAGCGT-G>73  
>Arg\_cluster7 1>GATCCCATAGCGGAGTGGATATC-GCGTTAGACTCCGAATCTAAAGTTCGTTGGGTTTCGATTCC-CACTG-GGATCA>73

**Conclusion:** Low expressed Arg\_cluster4=at\_tRNA<sub>Arg\_CCG1</sub> is highly similar to Arg\_cluster3 and thus can be removed

>Asn\_cluster1 consensus sequence tRNA-Asn-GTT-3-1=tRNA-Asn-GTT-3-2=tRNA-Asn-GTT-3-3=tRNA-Asn-GTT-3-4=tRNA-Asn-GTT-3-5=tRNA-Asn-GTT-3-6|tRNA-Asn-GTT-1-1|tRNA-Asn-GTT-2-1|tRNA-Asn-GTT-8-1  
GCTGGAATAGCTCAGTTGGT-TTAGAGCGTGTGGCTGTTAACCACAAGGTCGAGGTTTCGANCCCTCCTTCTAGCG>74  
>Asn\_cluster2 consensus sequence tRNA-Asn-GTT-4-1=tRNA-Asn-GTT-4-2=tRNA-Asn-GTT-4-3=tRNA-Asn-GTT-4-4|tRNA-Asn-GTT-5-1  
GCTGGAGTAGCTCAGTTGGTTAGAGCGTGTGGCTGTTAACCACAAGGTCAGAGGTTTCGACCCCTNCTCTAGCG  
>Asn\_cluster3 consensus sequence tRNA-Asn-GTT-7-1  
TCTCAGTAGCTCAGTTGGTAGAGCGTGTGTTAAGTATTGGTTCGATGGTTCAAATCCTACTTGGGGAG  
>Asn\_cluster4 consensus sequence tRNA-Asn-GTT-9-1  
GCTGGAATAGCTCAGTTGGTTAGAGCGTGTGGCTGTTAACCACAAGGTCGAGGTTTCGACCCCTCCTTCTAGCG  
  
1>GCTGGAATAGCTCAGTTGG-TTAGAGCGTGTGGCTGTTAACCACAAGGTCGAGGTTTCGANCCCTCCTTCTAGCG>74  
1>GCTGGAGTAGCTCAGTTGG-TTAGAGCGTGTGGCTGTTAACCACAAGGTCAGAGGTTTCGACCCCTNCTCTAGCG>74  
1>GCTGGAATAGCTCAGTTGG-TTAGAGCGTGTGGCTGTTAACCACAAGGTCGAGGTTTCGANCCCTCCTTCTAGCG>75

**Conclusion:** Merge Asn\_cluster1=at\_tRNA<sub>Asn\_GTT1</sub> and Asn\_cluster2=at\_tRNA<sub>Asn\_GTT2</sub>, Asn\_cluster4=at\_tRNA<sub>Asn\_GTT4</sub> removed

1>GCTGGAATAGCTCAGTTGG-TTAGAGCGTGTGGCTGTTAACCACAAGGTCGAGGTTTCGANCCCTCCTTCTAGCG>74  
1>GCTGGAGTAGCTCAGTTGG-TTAGAGCGTGTGGCTGTTAACCACAAGGTCAGAGGTTTCGACCCCTNCTCTAGCG>74  
**Consensus** 1>gctggantagctcagttgg-ttagagcgtgtggctgttaaccacaaggtcngaggttcganccctnnntctagcg>74

>Leu\_cluster1 consensus sequence tRNA-Leu-AAG-1-1=tRNA-Leu-AAG-1-10=tRNA-Leu-AAG-1-2=tRNA-Leu-AAG-1-3=tRNA-Leu-AAG-1-4=tRNA-Leu-AAG-1-5=tRNA-Leu-AAG-1-6=tRNA-Leu-AAG-1-7=tRNA-Leu-AAG-1-8=tRNA-Leu-AAG-1-9=tRNA-Leu-AAG-2-1|tRNA-Leu-CAG-1-1=tRNA-Leu-CAG-1-2=tRNA-Leu-CAG-1-3  
GTNNANATGGCCAGTTGGTCTAAGGCGCCAGTNTNAGGTNCTGGTCCGAAAGGGCGTGGGTTCAAATCCCAGTNTNACA  
>Leu\_cluster2 consensus sequence tRNA-Leu-TAG-1-1=tRNA-Leu-TAG-1-2=tRNA-Leu-TAG-1-3=tRNA-Leu-TAG-1-4|tRNA-Leu-TAG-2-1=tRNA-Leu-TAG-2-2=tRNA-Leu-TAG-2-3|tRNA-Leu-TAG-3-1=tRNA-Leu-TAG-3-2  
GACAGTTTGGCCAGTGGTCTAAGGCGCCAGATTTAGGCTCTGGTCCGAAAGGGCGTGGGTTCAAATCCCAGCTGTCA

```
>Leu_cluster3 consensus sequence tRNA-Leu-CAA-1-1=tRNA-Leu-CAA-1-2=tRNA-Leu-CAA-1-3=tRNA-Leu-CAA-3-1|tRNA-Leu-CAA-2-1=tRNA-Leu-CAA-2-2=tRNA-Leu-CAA-2-3|tRNA-Leu-CAA-5-1=tRNA-Leu-CAA-5-2|tRNA-Leu-CAA-4-1|tRNA-Leu-TAA-1-1
GTCAGGATGGCCGAGTGGTCTAAGGCGCCAGACTCAAGTCTGGTCTCGTAAGAGGGCGTGGGTTCAAATCCCACCTTCTGACA
>Leu_cluster4 consensus sequence tRNA-Leu-TAA-2-1=tRNA-Leu-TAA-2-2=tRNA-Leu-TAA-2-3=tRNA-Leu-TAA-3-1=tRNA-Leu-TAA-3-2
gcaggtttgcccagtggttaagggggaagacttaagttctctgcacataagtgccgctgggttcgaaccccacagcctgca
>Leu_cluster5 consensus sequence tRNA-Leu-AAG-4-1
gggcatttggctagtggtttgatatttcgcttaaggtgagaggtcccaggttcaattctcagaatgcccc
```

```
Leu_cluster1 GTNNANATGGCCGAGTGGTCTAAGGCGCCAGNTTNAGGTCNCTGGTCC---GAAAGGGCGTGGGTTCAAATCCCACNTNNACA
Leu_cluster2 GACAGTTTGGCCGAGTGGTCTAAGGCGCCAGATTTAGGCTCTGGTCC---GAAAGGGCGTGGGTTCAAATCCCACAGCTGTGCA
Leu_cluster3 GTCAGGATGGCCGAGTGGTCTAAGGCGCCAGACTCAAGTCTGGTCTCGTAAGAGGGCGTGGGTTCAAATCCCACCTTCTGACA
Leu_cluster4 gcaggtttgcccagtggttaagggggaagacttaagttctctgcacataagtgccgctgggttcgaaccccacagcctgca
Leu_cluster5 gggcatttggctagtggtttgatatttcgcttaaggtgagaggtcccaggttcaattctcagaatgcccc
```

**Conclusion:** Sequence Leu\_cluster5=at\_tRNA<sub>Leu</sub>\_AAG2 too short, unique gene tRNA-Leu-AAG-4-1 (pseudogene?), to remove

```
Leu_cluster1 GTNNANATGGCCGAGTGGTCTAAGGCGCCAGNTTNAGGTCNCTGGTCC---GAAAGGGCGTGGGTTCAAATCCCACNTNNACA
Leu_cluster2 GACAGTTTGGCCGAGTGGTCTAAGGCGCCAGATTTAGGCTCTGGTCC---GAAAGGGCGTGGGTTCAAATCCCACAGCTGTGCA
Leu_cluster3 GTCAGGATGGCCGAGTGGTCTAAGGCGCCAGACTCAAGTCTGGTCTCGTAAGAGGGCGTGGGTTCAAATCCCACCTTCTGACA
```

**Conclusion:** Three tRNAs are very similar, so keep Leu\_cluster3 (seems to be major) and collapse Leu\_cluster 1 and 2 in one

```
Leu_cluster1 GTNNANATGGCCGAGTGGTCTAAGGCGCCAGNTTNAGGTCNCTGGTCC---GAAAGGGCGTGGGTTCAAATCCCACNTNNACA
Leu_cluster2 GACAGTTTGGCCGAGTGGTCTAAGGCGCCAGATTTAGGCTCTGGTCC---GAAAGGGCGTGGGTTCAAATCCCACAGCTGTGCA
consensus gnnnnntggccgagttgggtctaagggcgccagnttnaggnctgggtcc---gaaagggcggtgggttcaaatcccacnlnnnnca
```

Inosine-34 is most likely present in (no data in tRNAdb or MODOMICS):

```
>at_tRNAAla_AGC_CGC_TGC ggggatgtagctcatatggttagagcgctcgcttgcgatgagagagcagggggttcgatccccgcactccacca
>at_tRNAArg_ACG gactccatggcccaatggataaagcgctggtctccgaaaccagagattctgggttcgatccccagtgagtcgcca
>at_tRNAIle_AAT gggcnattagctcagttggttagagcgctcgctctataacgcgaaggtcncaggttcgannctgnatnngccacca
>at_tRNAPro_AGG_CGG_TGG gggcatttggctagtggttatgattctcgcttngggtgagagaggtcccaggttcgatctcggaaatgccccca
>at_tRNASer_AGA gtggacgtgcccagtggttatcgggcatgactgaaatcatgtgggcttgcgccgaggttcgaatcctgcccgttnacgcca
>at_tRNAThr_AGT gctntcntagctcagttggttagagcaccgcttggtaagcgggaggtcttgagttcaactctcaanganagcaca
>at_tRNAVal_AAC ggtttcgtggtgtagttggttatcacgtcagctctcacacactnaaggtctccggttcgaaccccggcggaagccacca
N are NOT replaced
```

**Drosophila melanogaster**

```
>Lys_cluster2 consensus sequence tRNA-Lys-TTT-2-1=tRNA-Lys-TTT-2-2=tRNA-Lys-TTT-2-3=tRNA-Lys-TTT-2-4=tRNA-Lys-TTT-2-5|tRNA-Lys-TTT-1-1
GCCCGGNTAGCTCAGTCGGTAGAGCATTGGACTTTTAAATCCAAGGGTCCAGGGTTCAAGTCCCTGNCTCGGGCGcca
>Lys_cluster1 consensus sequence tRNA-Lys-CTT-1-1=tRNA-Lys-CTT-1-10=tRNA-Lys-CTT-1-11=tRNA-Lys-CTT-1-12=tRNA-Lys-CTT-1-13=tRNA-Lys-CTT-1-2=tRNA-Lys-CTT-1-3=tRNA-Lys-CTT-1-4=tRNA-Lys-CTT-1-5=tRNA-Lys-CTT-1-6=tRNA-Lys-CTT-1-7=tRNA-Lys-CTT-1-8=tRNA-Lys-CTT-1-9
gccccgtagctcagtcggttagagcagcttaatctcagggtcgtgggttcgagccccacgctgggagCCA
```

```
>Lys_cluster1 1>gccccgtagctcagtcggttagagcagcttaatctcagggtcgtgggttcgagccccacgctgggagCCA>76
>Lys_cluster2 1>GCCCGGNTAGCTCAGTCGGTAGAGCATTGGACTTTTAAATCCAAGGGTCCAGGGTTCAAGTCCCTGNCTCGGGCGcca>76
```

**Conclusion:** 14 different nucleotides, but 3'-end is common, keep both sequences, Lys\_TTT seems to be minor tRNA

```
>Leu_cluster2 consensus sequence tRNA-Leu-CAA-1-1=tRNA-Leu-CAA-2-1=tRNA-Leu-CAA-2-2=tRNA-Leu-CAA-2-3
gtcaggatggccgagcgggtctaagggcgagactcaagttctggtcctctctgagggcggtgggttcgaatcccacttctgacaCCA
>Leu_cluster3 consensus sequence tRNA-Leu-CAG-1-1=tRNA-Leu-CAG-1-2=tRNA-Leu-CAG-1-3=tRNA-Leu-CAG-1-4=tRNA-Leu-CAG-1-5=tRNA-Leu-CAG-1-6=tRNA-Leu-CAG-1-7=tRNA-Leu-CAG-1-8
gtcaggatggccgagcgggtctaagggcgagctcaagttctggtcctctctgagggcggtgggttcgaatcccacttctgacaCCA
```

```
>Leu_cluster2 1>gtcaggatggccgagcgggtctaagggcgagactcaagttctggtcctctctgagggcggtgggttcgaatcccacttctgacaCCA>86
>Leu_cluster3 1>gtcaggatggccgagcgggtctaagggcgagctcaagttctggtcctctctgagggcggtgggttcgaatcccacttctgacaCCA>86
```

**Conclusion:** Two tRNAs are too similar at the 5'- and 3'-ends, keep both

```
>Arg_cluster4 consensus sequence tRNA-Arg-TCT-1-1|tRNA-Arg-TCT-2-1
GNCCCTTNGCGCANNGGATAGCGCTTGGACTTCTAAATCCAAGGTNGCGGGTTCGATNCCCGCAAGGGNTGcca
```

**Conclusion:** Arg\_cluster4=dm\_tRNA<sub>Arg</sub>\_TCT is low expressed, contains too many N, may be similar with Arg\_cluster3, thus removed

Inosine-34 is known to be present in:

```
>dm_tRNASer_AGA_CGA gcagtcgtggccgagcgggttaagggcgtctgactgaaatcagattccctctgggagcgtaggttcgaatcctaccggtgcccga
>dm_tRNAVal_AAC gttccggtgtagnggttatcacatcngcctcacacgngaagggcccccggttcnccccggcggaacacca
```

And is most likely present in (no data in tRNAdb or MODOMICS):

```
>dm_tRNAAla_AGC_CGC_TGC ggggatgtagctcagttggttagagcgctcgcttgcgatgagagaggtcccgggttcgatccccgcactccacca
>dm_tRNAArg_ACG ggtcctggtggcgaatggataacgcgctgactccggatcagaagattccaggttcgactcctggcaggtatgcca
>dm_tRNAIle_AAT gggccattagctcagttggttagagcgctcgctctataacgcgaaggtcgcgggttcgatccccctatgggcccacca
>dm_tRNALeu_AAG_TAG ggnagcgtggccgagcgggtctaagggcgtggttNagggaccagtcnncnnnnngcggtgggttcgaatcccaccgctgncacca
>dm_tRNAPro_AGG_CGG_TGG ggctcgttggctaggggttatgattctcgcttccgggtgagagaggtcccgggttcaaatcccggagcagccccca
>dm_tRNAThr_AGT ggccgctggcttagttggttaagcgcctgctctgtaaacagagagatcgtgagttcgaatntgccggggcctcca
```

**Homo sapiens**

>Leu\_cluster2 consensus sequence tRNA-Leu-CAA-1-1=tRNA-Leu-CAA-1-2|tRNA-Leu-CAA-2-1=tRNA-Leu-CAA-3-1=tRNA-Leu-CAA-4-1  
GTCAGGATGGCCAGTGGTCTAAGGCGCCAGACTCAAGTCTGGTCTCCNNATGGAGGCGTGGGTTCGAATCCCACCTTCTGACAcca  
>Leu\_cluster3 consensus sequence tRNA-Leu-CAG-1-1=tRNA-Leu-CAG-1-2=tRNA-Leu-CAG-1-3=tRNA-Leu-CAG-1-4=tRNA-Leu-CAG-1-5=tRNA-Leu-CAG-1-6=tRNA-Leu-CAG-1-7=tRNA-Leu-CAG-2-1=tRNA-Leu-CAG-2-2|tRNA-Leu-CAA-6-1  
GTCAGGATGGCCAGCNGTCTNAAGGCGCTGCGTTCANNTCGCANNCTCCNTGGAGGCGTGGGTTCGAATCCCACCTNNTGACAcca

>Leu\_cluster2 1>GTCAGGATGGCCAGTGGTCT-AAGGCGCCAGACTCAAGTCTGGTCTCCNNATGGAGGCGTGGGTTCGAATCCCACCTTCTGACA>  
>Leu\_cluster3 1>GTCAGGATGGCCAGCNGTCTNAAGGCGCTGCGTTCANNTCGCANNCTCC-NC TGGAGGCGTGGGTTCGAATCCCACCTNNTGACA>84  
**Conclusion:** Too similar at the 5'- and 3'-ends, keep both

>Tyr\_cluster1 consensus sequence tRNA-Tyr-GTA-1-1=tRNA-Tyr-GTA-2-1|tRNA-Tyr-GTA-3-1=tRNA-Tyr-GTA-6-1|tRNA-Tyr-GTA-4-1=tRNA-Tyr-GTA-5-1=tRNA-Tyr-GTA-5-2=tRNA-Tyr-GTA-5-3=tRNA-Tyr-GTA-5-4=tRNA-Tyr-GTA-5-5|tRNA-Tyr-GTA-7-1|tRNA-Tyr-GTA-8-1  
CCTTCGATAGCTCAGNTGGTAGAGCGGAGACTGTAGATCCTTAGGTCGCTGGTTCGANTCCGGCTCGAAGGAcca  
>Tyr\_cluster2 consensus sequence tRNA-Tyr-ATA-1-1  
ccttcaatagttcagctggttagagcagaggactataggtccttaggttgcctgattccagcttgaaggaCCA  
>Tyr\_cluster3 consensus sequence tRNA-Tyr-GTA-9-1  
tcttcaatagctcagctggttagagcagaggactgtagattccttaggtgctggtttgattccgacttggagagCCA

>Tyr\_cluster2 1>CCTTCAATAGTTCAGCTGGTAGAGCAGAGGACTATAGGTCCTTAGGTT-GCTGGTTCGATTCCAGCTTGAAGGA>73  
>Tyr\_cluster3 1>TCTTCAATAGTTCAGCTGGTAGAGCGAGGACTGTAGATTCTTAGG-T-GCTGGTTTGATTCCGACTTGGAGAG>72 minor

>Tyr\_cluster3 1>TCTTCAATAGTTCAGCTGGTAGAGCGAGGACTGTAGATTCTTAGG-T-GCTGGTTTGATTCCGACTTGGAGAG>72 minor  
>Tyr\_cluster1 1>CCTTCAATAGTTCAGCTGGTAGAGCGAGGACTGTAGATTCTTAGG-TCGCTGGTTCGANTCCGGCTCGAAGGA>73  
**Conclusion:** Low expressed Tyr\_cluster3 is removed

>Ala\_cluster1 consensus sequence tRNA-Ala-CGC-1-1=tRNA-Ala-CGC-2-1=tRNA-Ala-TGC-2-1=tRNA-Ala-TGC-3-1=tRNA-Ala-TGC-3-2|tRNA-Ala-TGC-5-1=tRNA-Ala-TGC-7-1|tRNA-Ala-AGC-2-1=tRNA-Ala-AGC-2-2=tRNA-Ala-AGC-3-1=tRNA-Ala-AGC-7-1|tRNA-Ala-AGC-1-1|tRNA-Ala-CGC-3-1|tRNA-Ala-CGC-4-1|tRNA-Ala-TGC-1-1|tRNA-Ala-TGC-4-1|tRNA-Ala-TGC-6-1|tRNA-Ala-AGC-4-1|tRNA-Ala-AGC-5-1|tRNA-Ala-AGC-6-1  
GGGGGTGTAGCTCAGTGGTAGAGCGCCTTNGCATGTATGAGGCCCGGGTTCGATCCCCGGCACCTCCAcca  
>Val\_cluster3 consensus sequence tRNA-Val-AAC-6-1  
gggggtgtagctcagctggttagagcgtatgcttaacattcatgaggctctgggttcgatccccagcacttccacca

>Ala\_cluster1 1>GGGGGTGTAGCTCAGTGGTAGAGCGCCTTNGCATGTATGAGGCCCGGGTTCGATCCCCGGCACCTCCA>72  
>Val\_cluster3 1>GGGGGTGTAGCTCAGTGGTAGAGCGTATGCTTAACATTCATGAGGCTCTGGTTCGATCCCCAGCATTCCA>72  
**Conclusion:** Val\_cluster3 is removed

Inosine-34 is known to be present in:

>hs\_tRNAAla\_CGC\_TGC\_AGC ggggggtgtagctcagctggttagagcgcctgcttgcgatgtatgaggccccgggttcgatccccggcacctccacca  
>hs\_tRNAAla\_AGC ggggaattagctcaagtggtagagcgcctgcttgcgatgagagaggttaggggatcgatgcccgacattctccacca

And is most likely present in (no data in tRNadb or MODOMICS):

>hs\_tRNAArg\_ACG gggccagtgccgcaattggataaacgcgtctgactccggatcagaagattctaggttcgactcctggctggctcgcca  
>hs\_tRNAIle\_AAT\_GAT ggcggttagctcagctggttagagcgcctgctgataaacgcaaggctcggggttcgatccccgtacngggccacca  
>hs\_tRNALeu\_AAG\_TAG ggtagcgtggccgagcgcgtctaagcgcctggattcaggctccagctctctcggggcggtgggttcgaatcccaccgctgccacca  
>hs\_tRNAPro\_AGG\_CGG\_TGG ggctcgttggcttaggggtatgattctcgttgggtgagagaggtcccggttcaaatcccggagcagccccca  
>hs\_tRNASer\_AGA\_TGA gtagtcgtggccgagctggttaagcgcctgactcgaatccattggggtntccccgcgcaggttcgaatcctcggactacgcca  
>hs\_tRNAThr\_AGT\_CGT\_TGT ggctcngtggcttagttggttaaacgcctgctcgtgtaaacaggagatcctgggttcgaatcccagcgggctcca  
>hs\_tRNATyr\_ATA ccttcaatagttcagctggttagagcagaggactcctaggtccttaggttgcctggttcgatccagcttgaaggacca  
>hs\_tRNAVal\_AAC\_CAC\_TAC1 gtttcctgtagttaggttatcacgttcgcctaacacgcgaaagggtccccggttcgaaacgggcggaacacca
